# Supplementary material
Source: ML conference proceedings conference paper supplement (https://proceedings.neurips.cc/paper_files/paper/2016/hash/6be5336db2c119736cf48f475e051bfe-Abstract.html)
Supplement: Supplementary file [file 6be5336db2c119736cf48f475e051bfe-Supplemental.zip]

## 6 Appendix

### 6.1 Proof of Lemma 3.1

**Sketch of proof:** We use change of variable  $\mathbf{W} = \mathbf{Z}\mathbf{Z}^\top$ . The matrix  $\mathbf{W}$  can be decomposed as  $\mathbf{Z}\mathbf{Z}^\top$  where  $\mathbf{Z}$  is  $p \times K$ , if and only if  $\mathbf{W} \succeq 0$  and has rank at most  $K$ . The constraints  $\|\mathbf{Z}\|_2 \leq \tau$ ,  $\|Z_i\|_2 \leq 1$  and  $\|\mathbf{Z}\|_F \leq \beta$  are equivalent with the constraints  $\mathbf{W} \preceq \tau^2 I$ ,  $\text{diag}(\mathbf{W}) \leq 1$  and  $\text{tr}(\mathbf{W}) \leq \beta^2$ , respectively. Also, note that the condition that the regularization parameters of all  $(i, j)$  pairs of variables are non-negative is satisfied implicitly. For the diagonal elements, we have the constraint  $\text{diag}(\mathbf{W}) \leq 1$  explicitly. Without loss of generality, assume  $i < j$ . We know  $\mathbf{W} \succeq 0$ , therefore we achieve:  $M = \begin{bmatrix} W_{ii} & W_{ij} \\ W_{ji} & W_{jj} \end{bmatrix} \succeq 0$ . Having  $W_{ii} \leq 1$  and  $W_{jj} \leq 1$ , we conclude  $W_{ij} = W_{ji} \leq 1$ .

### 6.2 Proof of Lemma 3.3

**Sketch of proof:** In the  $\mathbf{Z}$ -step, to estimate  $\mathbf{Z}$  given  $\Theta$  using the BCD method, we solve the following problem based on Eq (2):

$$\underset{\mathbf{Z} \in \mathcal{D}}{\text{maximize}} \quad \text{tr}(\mathbf{Z}\mathbf{Z}^\top |\Theta|), \quad (14)$$

which is equivalent to:

$$\underset{\mathbf{Z} \in \mathcal{D}}{\text{maximize}} \quad \sum_{i,j} (\mathbf{Z}\mathbf{Z}^\top)_{ij} |\Theta_{ij}|, \quad (15)$$

where  $\mathcal{D}$  is defined based on the two constraints (a) and (b) described above. First, note that by solving Eq (14), we will have  $\|Z_i\|_2 = 1$ , for all variables  $i$ . Hence, because of the binary assumption, each row of  $Z$  will have exactly one element with value 1 and the other elements will be 0.

Then, Eq (15) leads to:

$$\underset{\mathbf{Z} \in \mathcal{D}}{\text{maximize}} \quad \sum_{(i,j) \in \mathcal{F}_Z} |\Theta_{ij}|,$$

which is equivalent to

$$\underset{\mathbf{Z} \in \mathcal{D}}{\text{minimize}} \quad \sum_{(i,j) \notin \mathcal{F}_Z} |\Theta_{ij}|, \quad (16)$$

where  $\mathcal{F}_Z$  is the set of edges within blocks  $B_1, \dots, B_K$ :  $\mathcal{F}_Z = \cup_{k=1}^K \{(i, j) | i, j \in B_k\}$ . None of the blocks  $B_k$  for all  $k$  would be empty due to the constraint (b). Therefore, Eq (16) is equivalent with the  $K$ -way graph-cut problem on the similarity matrix  $|\Theta|$ .

Therefore, in the special case with constraints (a) and (b),  $\mathbf{Z}$ -step is  $K$ -way graph-cut on  $|\Theta|$ . The GRAB algorithm can be viewed as an iterative BCD method that 1) uses graph-cut as a clustering method to find  $\mathbf{Z}$  based on  $|\Theta|$  as a similarity matrix, and 2) learns a network structure of the GGM by solving graphical lasso problem to find  $\Theta$ .
